# Supplementary material
Source: HighWire-hosted journal article supplement (https://ard.bmj.com/highwire/filestream/202583/field_highwire_adjunct_files/1/ARD_table_135319.docx)

Supplemental table S1: Performance of the ASPIRE matrix models (ESR based) for the prediction of rapid radiographic progression (RRP), number needed to treat (NNT) with initial combination therapy instead of monotherapy to avoid one case of RRP for different patient groups and the predictive capacity of NNT for RRP at the optimal cut off as determined by ROC curve analysis.


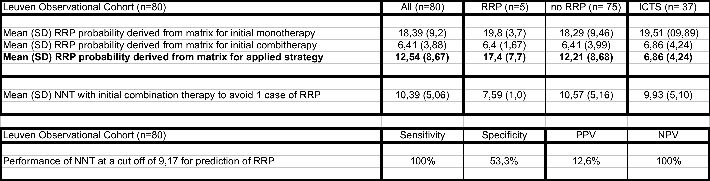

Supplement: ARD_table_135319.docx [file ARD_table_135319.docx]
